# Supplementary material
Source: publisher figshare collection journal article supplement (https://karger.figshare.com/ndownloader/files/21847374)
Supplement: Supplementary file 1 [file 21847374]

| **Supplemental Table I.** Primer list. | | |
| --- | --- | --- |
| **Name** | **Direction** | **Sequence (5' - 3')** |
| *ERβ* | Forward | TGCCTGTAAACAGAGAGACCC |
| Reverse | AGTCATTATGTCCTTGAATGCTTCT |
| *Cpne6* | Forward | ACCGAGACACGCTCACAAAG |
| Reverse | CGGGAGAAGACTGGGCTTG |
| *Cpne9* | Forward | ACGAACCGAGGTGATTGACAA |
| Reverse | CATCGAAGCGGAGATTTTGCT |
| *Rims2* | Forward | CTGCTCAGCTAGTGGGACG |
| Reverse | CCCGGATGATTTCTACCTCCAG |
| *Syt17* | Forward | GTCAGAGGTGCTATGAGTCCA |
| Reverse | GGGGTCAAAGGAACATCGCT |
| *Scamp1* | Forward | ATGTCGGATTTTGACAGCAACC |
| Reverse | GTCCCGGTGGCACATTTCT |
| *Arc* | Forward | AAGTGCCGAGCTGAGATGC |
| Reverse | CGACCTGTGCAACCCTTTC |
| *Syngr2* | Forward | GCGAGGGCTACACCAACATT |
| Reverse | GGCATCGACCACAAGGAAGAA |
| *Nrgn* | Forward | TCCAAGCCAGACGACGATATT |
| Reverse | CACACTCTCCGCTCTTTATCTTC |
| *Synpr* | Forward | GGCACCTTTCGGGCATTGA |
| Reverse | CCTCCTGAATAGCCACCACA |
| *Nrxn3* | Forward | GCACTATCCTACAGGCAACAC |
| Reverse | GGCCGGTTATATTTGAAGGGGA |
| *Cntnap1* | Forward | TTCTTGGGATTGGGTCACACG |
| Reverse | GCCCTTTTTGGTAGAATGGTGTC |
| *Plp1* | Forward | CCAGAATGTATGGTGTTCTCCC |
| Reverse | GGCCCATGAGTTTAAGGACG |
| *Cldn11* | Forward | ATGGTAGCCACTTGCCTTCAG |
| Reverse | AGTTCGTCCATTTTTCGGCAG |
| *Mbp* | Forward | AATCGGCTCACAAGGGATTCA |
| Reverse | TCCTCCCAGCTTAAAGATTTTGG |
| *Cnp* | Forward | TTTACCCGCAAAAGCCACACA |
| Reverse | CACCGTGTCCTCATCTTGAAG |
